# Supplementary material
Source: PubMed Central journal article supplement (PMC3349893)
Supplement: mmc1.pdf [file mmc1.pdf]

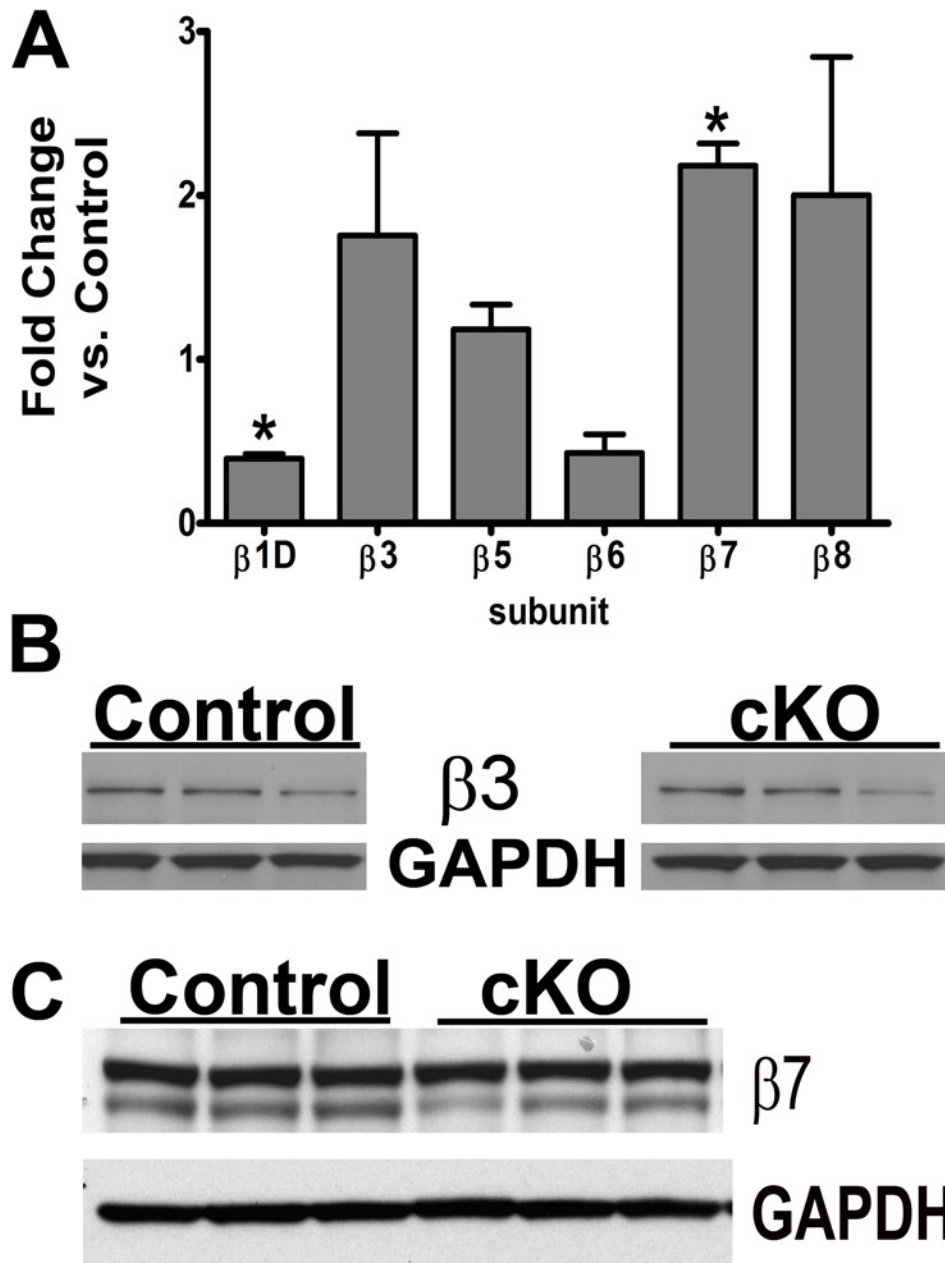

**Supplemental Figure S1– Evaluation of  $\beta$  integrin transcripts and protein in cardiac myocytes from control and cKO mice.**

**Panel A** - Quantitative RT-P+CR analysis of myocyte transcripts shows statistically significant reduction in  $\beta 1D$  integrin transcript, and increase in  $\beta 7$  transcript, in cKO vs. control samples. (n=3 each, \*p<0.05 vs. control).

**Panel B and C** – Western blots of myocyte lysates from Control and cKO mice show no differences in  $\beta 3$  or  $\beta 7$  integrin protein expression.
