# Supplementary material
Source: PubMed Central journal article supplement (PMC3349893)
Supplement: mmc2.pdf [file mmc2.pdf]

**Li, Wu, et. al. - Integrin function in the adult cardiac myocyte**

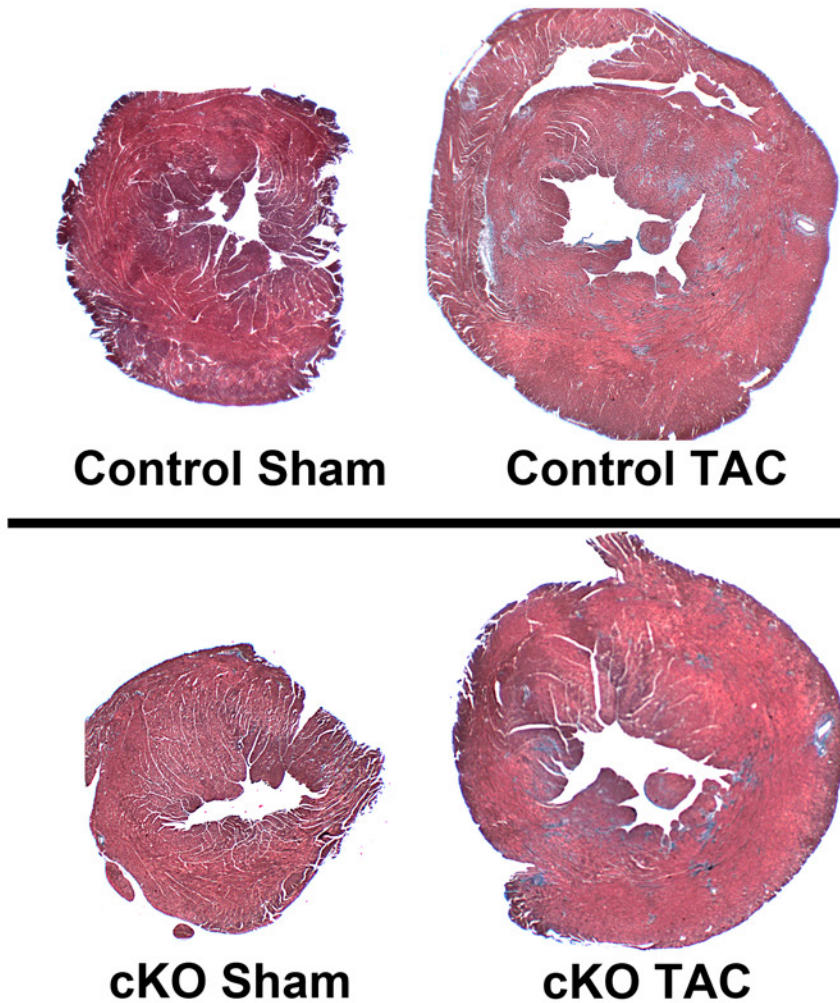

**Supplemental Figure S2 – No differences are noted in histological analysis of control vs. cKO hearts following hemodynamic loading provoked by TAC. Specimens from sham and TAC operated mice are shown for each group.**
