# Supplementary material
Source: PubMed Central journal article supplement (PMC3349893)
Supplement: mmc3.pdf [file mmc3.pdf]

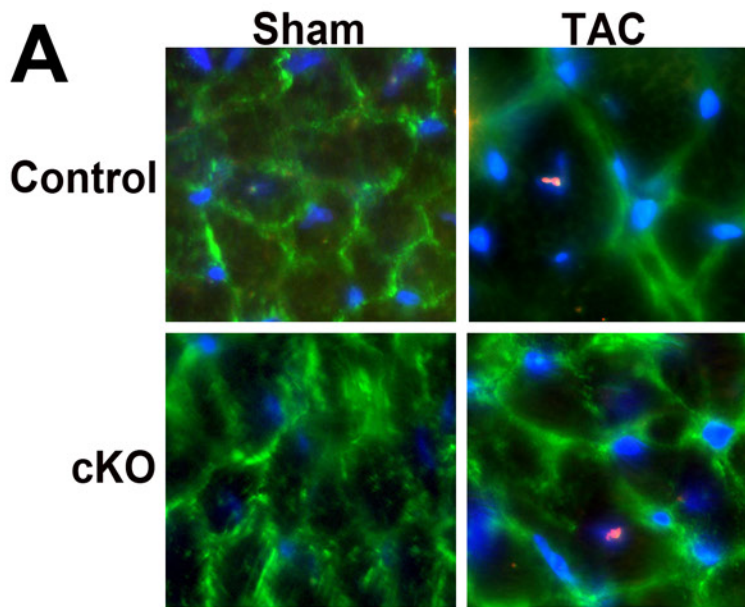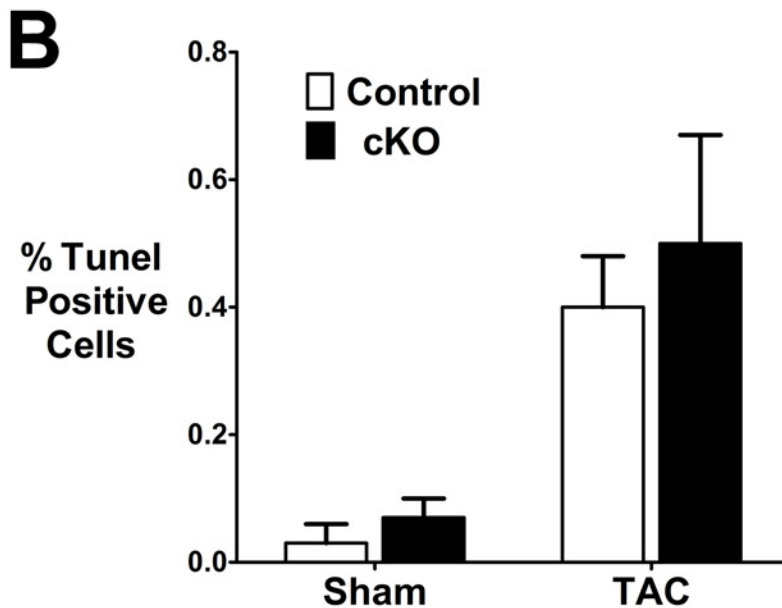

**Supplemental Figure S3 –TUNEL** Positive cells are increased by hemodynamic loading of the left ventricle but no significant differences are noted between control and cKO hearts either in the basal state, or following TAC.

**Panel A** – Representative specimens from control and cKO ventricles stained for a myocyte-specific marker ( $\alpha$ -sarcomeric actinin = green) and for TUNEL positive cells (Red) in both the sham and TAC operated state.

**Panel B** – Graphic depiction of %TUNEL positive cells in the sham and TAC specimens show no significant differences between the control or cKO samples in either the sham or TAC state. (n=3 mice in each group with >1000 cells assayed from each group.)
